# Supplementary material for: Quantum-chemical study of stable, meta-stable and high-pressure alumina polymorphs and aluminum hydroxides
Source: Royal Society of Chemistry journal article supplement (doi:10.1039/c4ta02663b), 2014-01-01
Supplement: c4ta02663b25.pdf [file c4ta02663b25.pdf]

Supplementary Information] Supplementary Information: Quantum-chemical  
study of stable, meta-stable and high-pressure  
alumina polymorphs and aluminum hydroxides

## 1 Basis sets

The pob-DZVP basis sets used in this work are listed below in the CRYSTAL  
format:

### 1.1 Aluminum

|    |              |                  |   |   |
|----|--------------|------------------|---|---|
| 13 | 8            |                  |   |   |
| 0  | 0            | 5                | 2 | 1 |
|    | 5887.5727030 | 0.0013483347987  |   |   |
|    | 885.61225996 | 0.0100715768090  |   |   |
|    | 201.13604899 | 0.0451324540560  |   |   |
|    | 56.284974674 | 0.1146126804300  |   |   |
|    | 17.229551243 | 0.1015960894300  |   |   |
| 0  | 0            | 3                | 2 | 1 |
|    | 29.340249922 | 0.0693474542080  |   |   |
|    | 3.0439630420 | -0.4252811767900 |   |   |
|    | 1.1285539518 | -0.4144983221000 |   |   |
| 0  | 0            | 1                | 2 | 1 |
|    | 0.3614799900 | 1.0000000000000  |   |   |
| 0  | 0            | 1                | 0 | 1 |
|    | 0.1440019200 | 1.0000000000000  |   |   |
| 0  | 2            | 5                | 6 | 1 |
|    | 145.11918809 | 0.0063963373134  |   |   |
|    | 33.717894833 | 0.0441893599650  |   |   |
|    | 10.369863083 | 0.1558157599300  |   |   |
|    | 3.5135616036 | 0.2863528695100  |   |   |
|    | 1.1980050273 | 0.2292142324800  |   |   |
| 0  | 2            | 1                | 1 | 1 |
|    | 0.4200672400 | 1.0000000000000  |   |   |
| 0  | 2            | 1                | 0 | 1 |
|    | 0.2100336200 | 1.0000000000000  |   |   |
| 0  | 3            | 1                | 0 | 1 |
|    | 0.3030089300 | 1.0000000000000  |   |   |

### 1.2 Oxygen

|   |              |                 |   |   |
|---|--------------|-----------------|---|---|
| 8 | 6            |                 |   |   |
| 0 | 0            | 5               | 2 | 1 |
|   | 2266.1767785 | -0.005343180993 |   |   |
|   | 340.87010191 | -0.039890039230 |   |   |
|   | 77.363135167 | -0.178539119850 |   |   |
|   | 21.479644940 | -0.464276849590 |   |   |
|   | 6.6589433124 | -0.443097451720 |   |   |
| 0 | 0            | 1               | 2 | 1 |
|   | 0.8478937000 | 1.0000000000000 |   |   |
| 0 | 0            | 1               | 0 | 1 |
|   | 0.2790534900 | 1.0000000000000 |   |   |
| 0 | 2            | 3               | 4 | 1 |
|   | 17.721504317 | 0.043394573193  |   |   |
|   | 3.8635505440 | 0.230941207650  |   |   |
|   | 1.0480920883 | 0.513753110640  |   |   |
| 0 | 2            | 1               | 0 | 1 |
|   | 0.2623818000 | 1.0000000000000 |   |   |
| 0 | 3            | 1               | 0 | 1 |
|   | 0.5000000000 | 1.0000000000000 |   |   |

### 1.3 Hydrogen

|   |             |            |   |   |
|---|-------------|------------|---|---|
| 1 | 3           |            |   |   |
| 0 | 0           | 3          | 1 | 1 |
|   | 24.62344998 | 0.01857031 |   |   |
|   | 3.640664800 | 0.14010862 |   |   |
|   | 0.773177290 | 0.55558583 |   |   |
| 0 | 0           | 1          | 0 | 1 |
|   | 0.136065500 | 1.00000000 |   |   |
| 0 | 2           | 1          | 0 | 1 |
|   | 0.184819860 | 1.00000000 |   |   |

## 2 Monkhorst-Pack k-point-lattices

Table ?? shows the Monkhorst-Pack **k**-point-lattices that were applied in this work.

summary of the applied Monkhorst-Pack **k**-point-lattices

|                                                                       | <b>k</b> -point-lattice |
|-----------------------------------------------------------------------|-------------------------|
| $\alpha$ -Al <sub>2</sub> O <sub>3</sub>                              | 12x12x12                |
| $\kappa$ -Al <sub>2</sub> O <sub>3</sub>                              | 12x6x6                  |
| $\theta$ -Al <sub>2</sub> O <sub>3</sub>                              | 12x12x12                |
| $\gamma$ -Spinell-Al <sub>2</sub> O <sub>3</sub>                      | 6x6x2                   |
| $\gamma$ -Paglia-Al <sub>2</sub> O <sub>3</sub>                       | 6x12x3                  |
| $\eta$ -E-Al <sub>2</sub> O <sub>3</sub>                              | 12x12x4                 |
| $\eta$ -ZS-Al <sub>2</sub> O <sub>3</sub>                             | 4x12x12                 |
| $\delta$ -RH-Al <sub>2</sub> O <sub>3</sub>                           | 12x12x3                 |
| $\delta$ -FE-Al <sub>2</sub> O <sub>3</sub>                           | 12x12x4                 |
| $\iota$ -Al <sub>2</sub> O <sub>3</sub>                               | 12x12x12                |
| <i>Rh</i> <sub>2</sub> O <sub>3</sub> -Al <sub>2</sub> O <sub>3</sub> | 8x12x12                 |
| <i>CaIrO</i> <sub>3</sub> -Al <sub>2</sub> O <sub>3</sub>             | 12x12x12                |
| Boehmite                                                              | 12x12x12                |
| Gibbsite                                                              | 9x12x6                  |
| Bayerite                                                              | 12x12x12                |
| Tohdite                                                               | 12x12x8                 |

### 3 Density of states

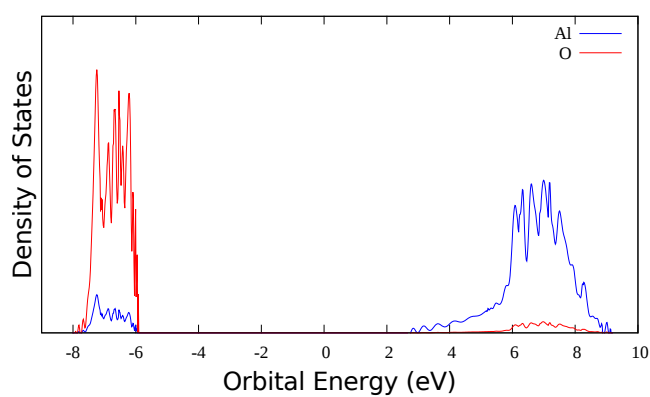

Figure 1:  $\alpha$ - $\text{Al}_2\text{O}_3$ , density of states

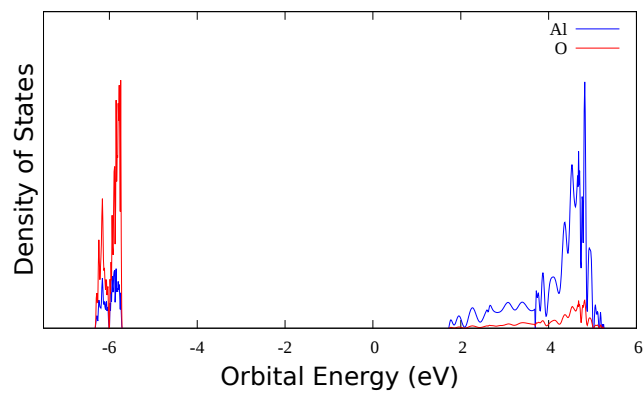

Figure 2:  $\kappa$ - $\text{Al}_2\text{O}_3$ , density of states

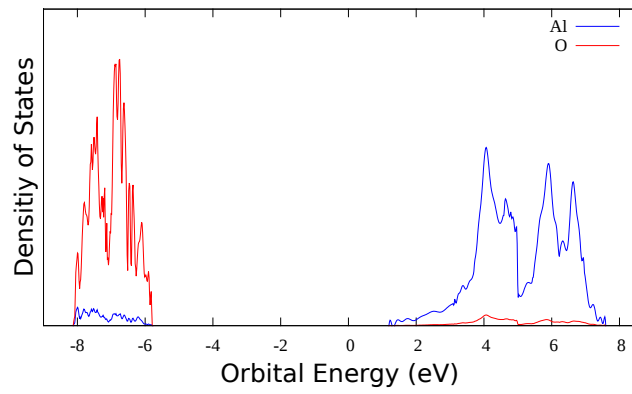

Figure 3:  $\theta$ - $\text{Al}_2\text{O}_3$ , density of states

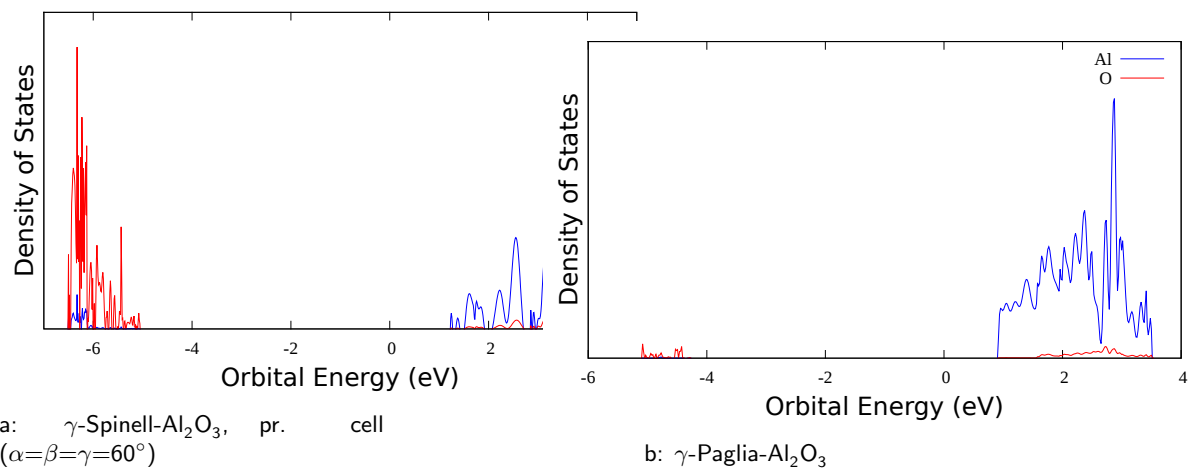

Figure 4:  $\gamma$ - $\text{Al}_2\text{O}_3$ , density of states

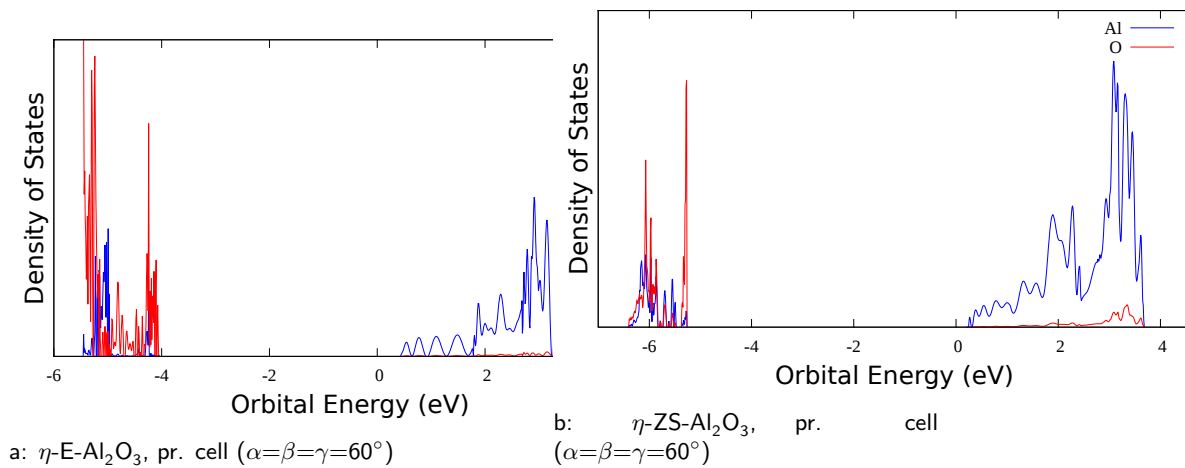

Figure 5:  $\eta$ - $\text{Al}_2\text{O}_3$ , density of states

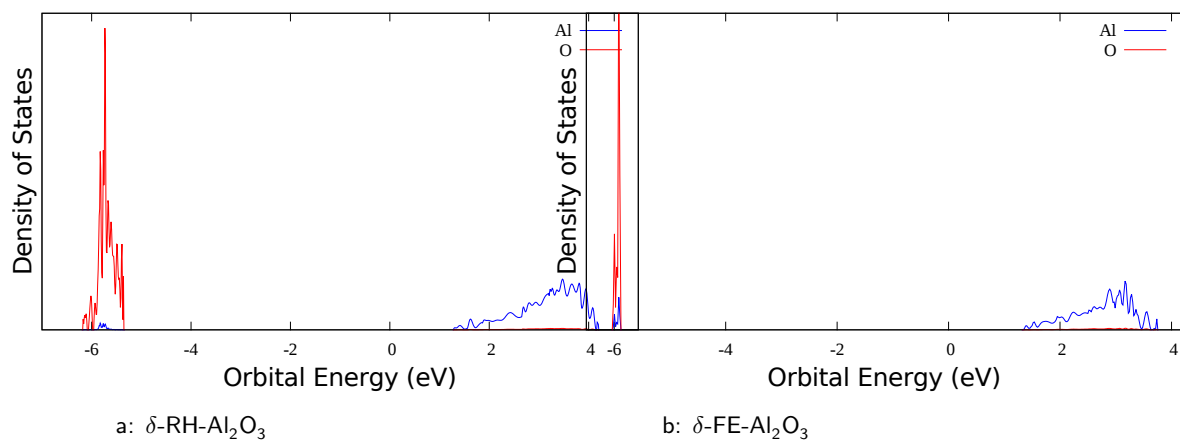

Figure 6:  $\delta$ - $\text{Al}_2\text{O}_3$ , density of states

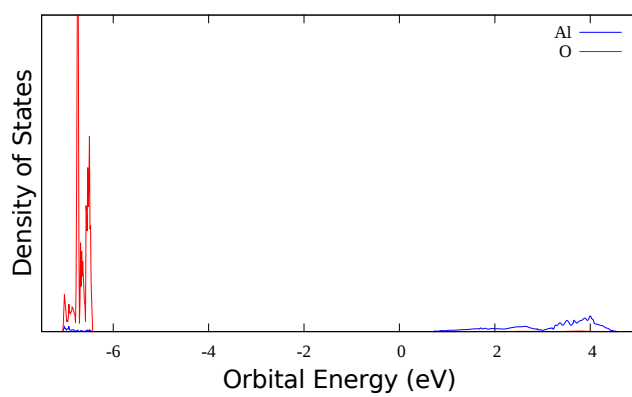

Figure 7:  $l$ - $\text{Al}_2\text{O}_3$ , density of states

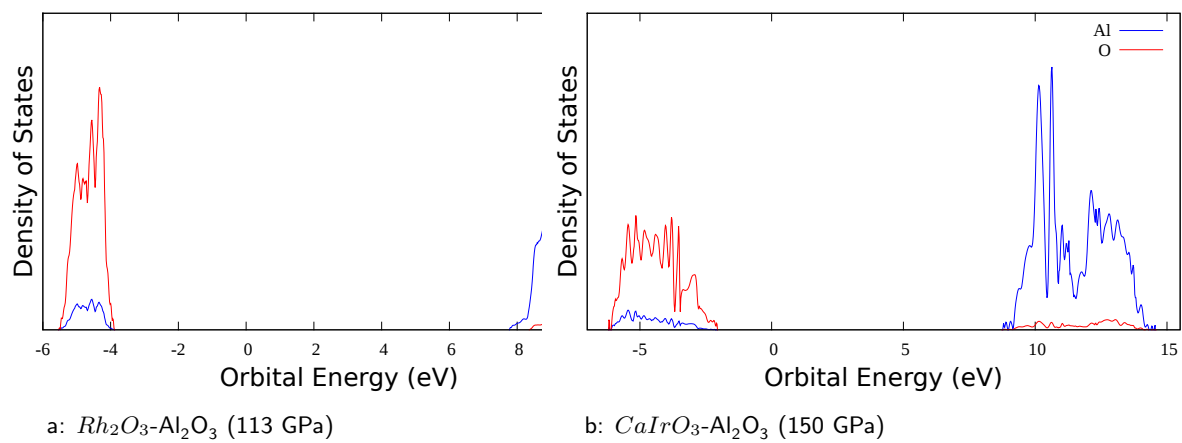

Figure 8: high pressure phases, density of states

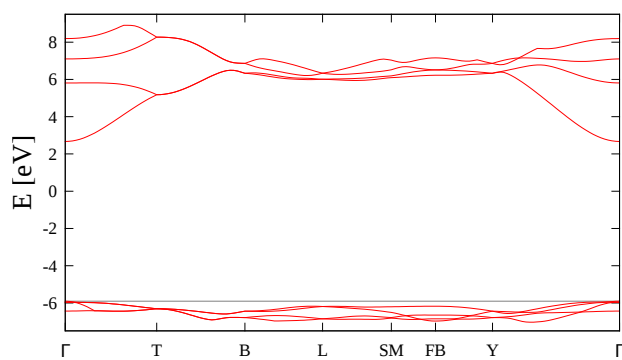

Figure 9:  $\alpha-Al_2O_3$ , band structure

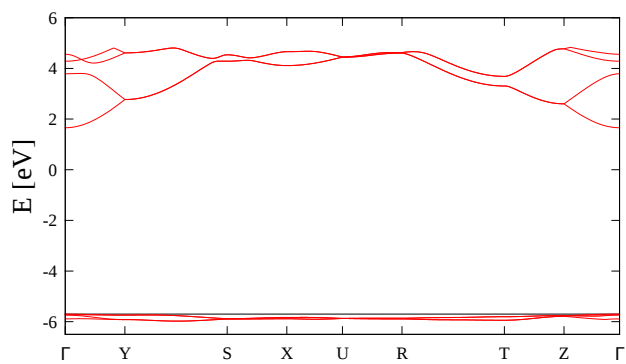

Figure 10:  $\kappa\text{-Al}_2\text{O}_3$ , band structure

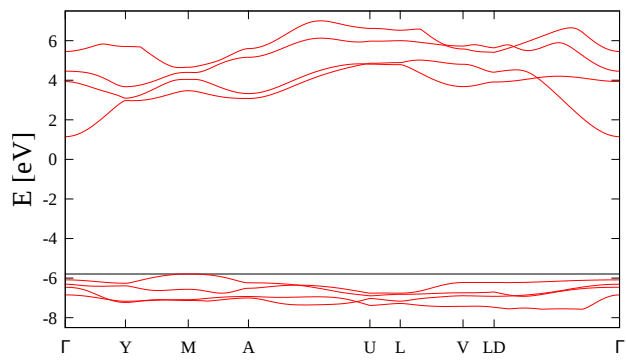

Figure 11:  $\theta\text{-Al}_2\text{O}_3$ , band structure



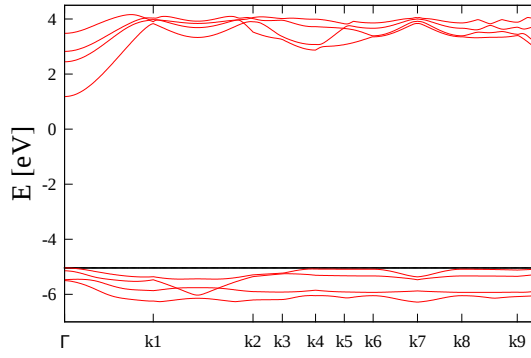

a:  $\gamma$ -Spinell- $\text{Al}_2\text{O}_3$ ,pr. cell  
 $(\alpha=\beta=\gamma=60^\circ)^*$

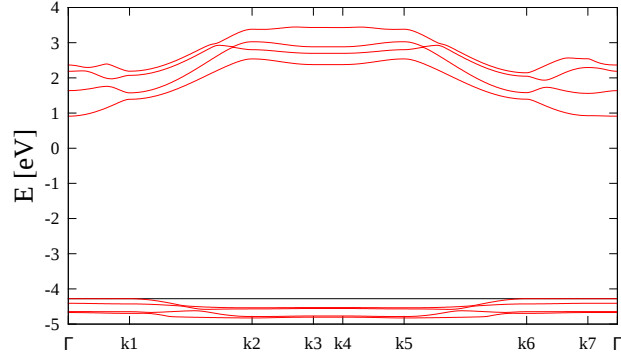

b:  $\gamma$ -Paglia- $\text{Al}_2\text{O}_3^{**}$

Figure 12:  $\gamma$ - $\text{Al}_2\text{O}_3$ , band structure

## 4 Band structure

\*  $k_1(1/3,-1/3,0)$ ;  $k_2(u,v,1/8)$ ;  $k_3(3/4,1/2,3/4)$ ;  $k_4(5/8,5/8,3/4)$ ;  $k_5(u,u,1/8)$ ;  $k_6(1/2,1/2,1/2)$ ;  $k_7(1/3,2/3,1/2)$ ;  
 $k_8(0,1/2,0)$ ;  $k_9(1/2,1/8)$ ;  $k_{10}(u,u,7/12)$   
 \*\*  $k_1(-1/2,0,0)$ ;  $k_2(-1/2,-1/2,0)$ ;  $k_3(0,-1/2,0)$ ;  $k_4(0,-1/2,-1/2)$ ;  $k_5(-1/2,-1/2,-1/2)$ ;  $k_6(-1/2,0,-1/2)$ ;  
 $k_7(0,0,-1/2)$

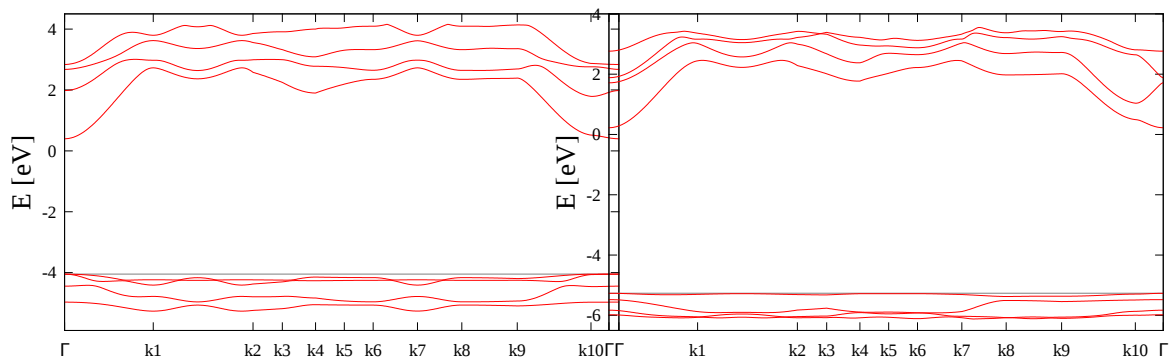

a:  $\eta$ -E- $\text{Al}_2\text{O}_3$ , pr. cell  
 $(\alpha=\beta=\gamma=60^\circ)^*$

b:  $\eta$ -ZS- $\text{Al}_2\text{O}_3$ , pr. cell  
 $(\alpha=\beta=\gamma=60^\circ)^*$

Figure 13:  $\eta$ - $\text{Al}_2\text{O}_3$ , band structure

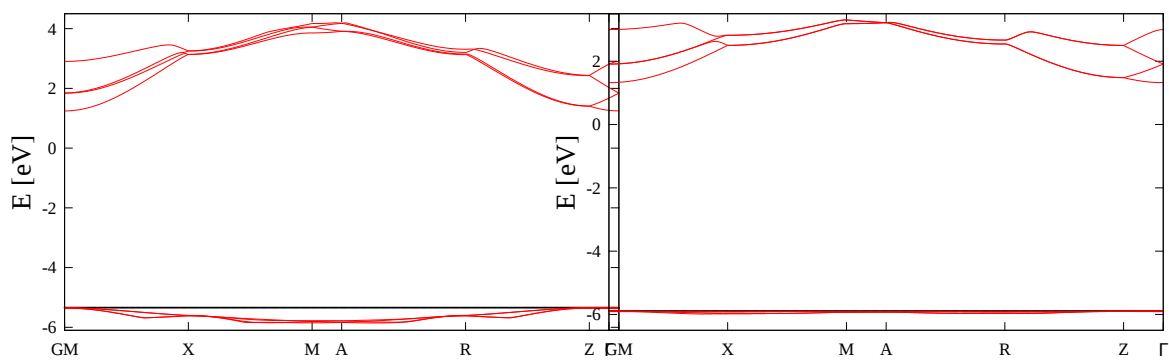

a:  $\delta$ -RH- $\text{Al}_2\text{O}_3$

b:  $\delta$ -FE- $\text{Al}_2\text{O}_3$

Figure 14:  $\delta$ - $\text{Al}_2\text{O}_3$ , band structure

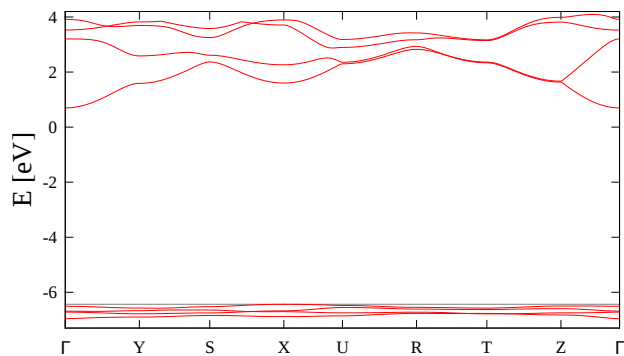

Figure 15:  $t$ - $\text{Al}_2\text{O}_3$ , band structure

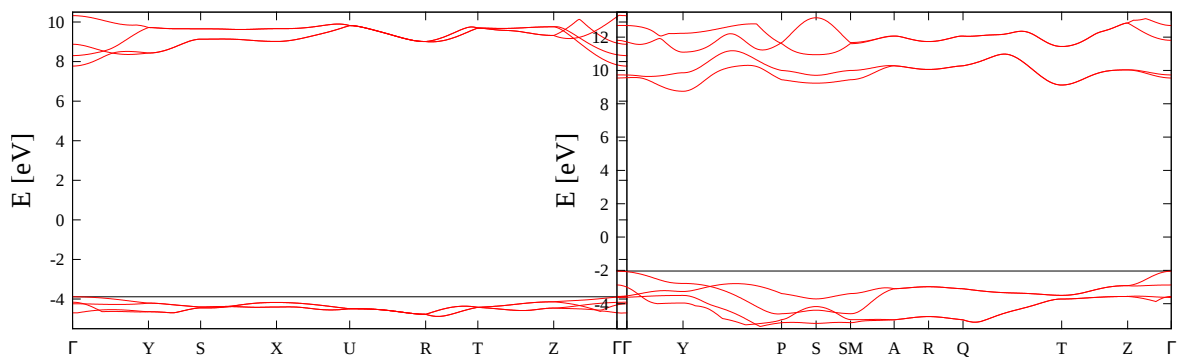

a:  $\text{Rh}_2\text{O}_3$ - $\text{Al}_2\text{O}_3$  (113 GPa)

b:  $\text{CaIrO}_3$ - $\text{Al}_2\text{O}_3$  (150 GPa)

Figure 16: high pressure phases, band structure

## 5 Atomic positions

The atomic positions of the relaxed structures are given below:

### 5.1 $\alpha$ -Al<sub>2</sub>O<sub>3</sub>

Conventional cell with the space group  $R\bar{3}c$  (no. 167) and the lattice constants:

$a = 4.788 \text{ \AA}$ ,  $b = 4.788 \text{ \AA}$ ,  $c = 13.032 \text{ \AA}$ ,  $\alpha = 90.0^\circ$ ,  $\beta = 90.0^\circ$ ,  $\gamma = 120.0^\circ$

**atoms in the asymmetric unit: 2**

|   |    | x/a          | y/b          | z/c          |
|---|----|--------------|--------------|--------------|
| 1 | AL | 3.33333E-01  | -3.33333E-01 | 1.86064E-02  |
| 2 | O  | -3.61026E-01 | -3.33333E-01 | -8.33333E-02 |

### 5.2 $\kappa$ -Al<sub>2</sub>O<sub>3</sub>

Primitive cell with the space group  $Pna2_1$  (no. 33) and the lattice constants:

$a = 4.870 \text{ \AA}$ ,  $b = 8.355 \text{ \AA}$ ,  $c = 8.968 \text{ \AA}$ ,  $\alpha = 90.0^\circ$ ,  $\beta = 90.0^\circ$ ,  $\gamma = 90.0^\circ$

**atoms in the asymmetric unit: 10**

|    |    | x/a          | y/b          | z/c          |
|----|----|--------------|--------------|--------------|
| 1  | AL | -3.16834E-01 | -1.61042E-01 | 4.53033E-03  |
| 2  | AL | 1.85678E-01  | 3.45864E-01  | -2.16909E-01 |
| 3  | AL | -1.78532E-01 | -3.48677E-01 | -3.05444E-01 |
| 4  | AL | -3.26911E-01 | 4.70679E-01  | -5.07909E-03 |
| 5  | O  | 3.42572E-01  | -1.61097E-01 | -1.05299E-01 |
| 6  | O  | 2.18512E-02  | 4.86871E-01  | -3.70028E-01 |
| 7  | O  | 4.79161E-01  | -3.31758E-01 | -3.64114E-01 |
| 8  | O  | -4.80268E-01 | -3.24726E-01 | 1.23847E-01  |
| 9  | O  | -1.56460E-01 | 3.31523E-01  | -1.30602E-01 |
| 10 | O  | 3.42949E-01  | -4.99914E-01 | -1.00200E-01 |

### 5.3 $\theta$ -Al<sub>2</sub>O<sub>3</sub>

Conventional cell with the space group  $C2/m$  (no. 12) and the lattice constants:

$a = 11.803 \text{ \AA}$ ,  $b = 2.932 \text{ \AA}$ ,  $c = 5.650 \text{ \AA}$ ,  $\alpha = 90.0^\circ$ ,  $\beta = 103.9^\circ$ ,  $\gamma = 90.0^\circ$

**atoms in the asymmetric unit: 5**

|   |    | x/a          | y/b          | z/c          |
|---|----|--------------|--------------|--------------|
| 1 | AL | 9.16622E-02  | -1.20229E-17 | -2.02707E-01 |
| 2 | AL | -1.58498E-01 | 5.00000E-01  | -3.17427E-01 |
| 3 | O  | 1.63995E-01  | 6.42347E-19  | 1.10240E-01  |
| 4 | O  | -4.91736E-03 | 5.00000E-01  | 2.54787E-01  |
| 5 | O  | -1.72741E-01 | 2.15009E-17  | 4.36309E-01  |

## 5.4 $\gamma$ -Spinell- $\text{Al}_2\text{O}_3$

Primitive cell ( $3 \times 1 \times 1$ -supercell) with the space group  $Fd\bar{3}m$  (no. 227) and the lattice constants:

$a = 5.607 \text{ \AA}$ ,  $b = 5.607 \text{ \AA}$ ,  $c = 16.821 \text{ \AA}$ ,  $\alpha = 60.0^\circ$ ,  $\beta = 60.0^\circ$ ,  $\gamma = 60.0^\circ$

**atoms in the asymmetric unit: 31**

|    |    | x/a          | y/b          | z/c          |    |   | x/a          | y/b          | z/c          |
|----|----|--------------|--------------|--------------|----|---|--------------|--------------|--------------|
| 1  | AL | -3.70845E-01 | -3.81301E-01 | 2.14708E-01  | 17 | O | 4.03176E-01  | 3.67775E-01  | -4.62423E-02 |
| 2  | AL | -3.78345E-01 | -3.68852E-01 | -4.64679E-01 | 18 | O | 3.87217E-01  | 3.75748E-01  | 2.87095E-01  |
| 3  | AL | -3.75466E-01 | -3.74792E-01 | -1.25001E-01 | 19 | O | 3.75860E-01  | 3.87274E-01  | -3.83469E-01 |
| 4  | AL | -3.44432E-01 | -3.82533E-01 | 3.64998E-02  | 20 | O | -1.39911E-01 | 3.77728E-01  | 1.28151E-01  |
| 5  | AL | -4.06010E-01 | -3.67268E-01 | -2.86484E-01 | 21 | O | -1.44063E-01 | 3.68948E-01  | 4.68721E-01  |
| 6  | AL | 1.21859E-01  | -3.81272E-01 | 2.13561E-01  | 22 | O | -1.45804E-01 | 3.85368E-01  | -2.08311E-01 |
| 7  | AL | 1.28864E-01  | -3.69075E-01 | -4.63571E-01 | 23 | O | -1.09876E-01 | -1.21214E-01 | 2.81382E-01  |
| 8  | AL | 2.67863E-01  | 2.44069E-01  | 8.13325E-02  | 24 | O | -1.42009E-01 | -1.31773E-01 | -3.79276E-01 |
| 9  | AL | 2.40861E-01  | 2.46894E-01  | 4.21783E-01  | 25 | O | -1.52469E-01 | -1.18842E-01 | -3.86742E-02 |
| 10 | AL | 2.53328E-01  | 2.44996E-01  | -2.47773E-01 | 26 | O | -1.25556E-01 | -1.37403E-01 | 1.33454E-01  |
| 11 | AL | -3.97869E-03 | 5.39950E-03  | -2.27343E-03 | 27 | O | -1.36612E-01 | -1.26021E-01 | 4.62885E-01  |
| 12 | AL | 9.59061E-03  | 2.89603E-03  | 3.28205E-01  | 28 | O | -1.54084E-01 | -1.17305E-01 | -2.03768E-01 |
| 13 | AL | -1.80054E-02 | 5.99987E-03  | -3.31331E-01 | 29 | O | 3.95034E-01  | -1.34989E-01 | -4.16852E-02 |
| 14 | O  | 3.92136E-01  | 3.81577E-01  | 1.29295E-01  | 30 | O | 3.94499E-01  | -1.19216E-01 | 2.81311E-01  |
| 15 | O  | 3.60414E-01  | 3.70851E-01  | 4.68632E-01  | 31 | O | 3.89943E-01  | -1.27716E-01 | -3.78170E-01 |
| 16 | O  | 4.01640E-01  | 3.69352E-01  | -2.11348E-01 |    |   |              |              |              |

## 5.5 $\gamma$ -Paglia- $\text{Al}_2\text{O}_3$

Primitive cell ( $2 \times 1 \times 4$ -supercell) with the space group P1 (no. 1) (originally SG  $I4_1/amd$ ) and the lattice constants:

$a = 5.661 \text{ \AA}$ ,  $b = 5.661 \text{ \AA}$ ,  $c = 7.840 \text{ \AA}$ ,  $\alpha = 90.0^\circ$ ,  $\beta = 90.0^\circ$ ,  $\gamma = 90.0^\circ$

**atoms in the asymmetric unit: 160**

|    |    | x/a          | y/b          | z/c          |    |    | x/a          | y/b          | z/c          |
|----|----|--------------|--------------|--------------|----|----|--------------|--------------|--------------|
| 1  | AL | 3.19988E-01  | 4.12891E-02  | 1.74664E-01  | 41 | AL | -3.21652E-01 | 3.08975E-01  | -2.37877E-01 |
| 2  | AL | 1.80010E-01  | -2.07861E-01 | 9.21882E-02  | 42 | AL | -1.93214E-01 | -4.48765E-01 | -3.31154E-01 |
| 3  | AL | 1.71091E-01  | 2.98319E-01  | 2.56861E-01  | 43 | AL | -5.61254E-02 | 3.04158E-01  | -2.42615E-01 |
| 4  | AL | 3.20331E-01  | -4.50435E-01 | 1.73601E-01  | 44 | AL | 3.21602E-01  | -1.88208E-01 | -4.64566E-01 |
| 5  | AL | 4.39569E-01  | 2.98139E-01  | 2.62767E-01  | 45 | AL | 3.14525E-01  | 2.98376E-01  | -4.48757E-01 |
| 6  | AL | -1.82419E-01 | 5.15790E-02  | 1.76132E-01  | 46 | AL | 6.01065E-02  | 2.96022E-01  | -3.72763E-01 |
| 7  | AL | -3.12951E-01 | 2.98016E-01  | 2.60413E-01  | 47 | AL | -1.85359E-01 | -2.12567E-01 | 4.61220E-01  |
| 8  | AL | -1.81840E-01 | -4.60223E-01 | 1.72594E-01  | 48 | AL | -1.81869E-01 | 2.98759E-01  | -4.52067E-01 |
| 9  | AL | -4.36353E-01 | -4.56624E-01 | 1.32204E-02  | 49 | AL | -4.45164E-01 | 2.99044E-01  | -3.70205E-01 |
| 10 | AL | -5.80945E-02 | -2.00065E-01 | 8.75142E-02  | 50 | AL | 5.55170E-02  | -1.97982E-01 | -2.83089E-01 |
| 11 | AL | 7.58157E-02  | 6.03656E-03  | 3.44182E-01  | 51 | AL | -4.29085E-01 | -1.91706E-01 | -2.86404E-01 |
| 12 | AL | -4.44107E-01 | 4.01634E-02  | 3.47805E-01  | 52 | AL | -1.87033E-01 | -1.93993E-01 | -2.10001E-01 |
| 13 | AL | -4.39398E-01 | -4.36712E-01 | 3.47822E-01  | 53 | AL | -4.34731E-01 | 2.93778E-01  | 1.35128E-01  |
| 14 | AL | 2.97846E-01  | 2.33795E-02  | -1.67493E-01 | 54 | AL | 6.38561E-02  | -1.98098E-01 | 2.14167E-01  |
| 15 | AL | 1.90426E-01  | 2.88791E-01  | -6.93419E-02 | 55 | AL | 3.18400E-01  | -1.94902E-01 | 3.01362E-01  |
| 16 | AL | 4.39401E-01  | 2.84186E-01  | -7.50725E-02 | 56 | AL | 3.05640E-01  | 2.83442E-01  | -2.92056E-01 |
| 17 | AL | -3.13905E-01 | 3.02392E-01  | -8.25619E-02 | 57 | AL | -4.37770E-01 | -2.05910E-01 | 1.33817E-01  |
| 18 | AL | -6.27157E-02 | 2.90629E-01  | -6.89169E-02 | 58 | AL | 3.11294E-01  | -2.15204E-01 | -2.88989E-01 |
| 19 | AL | 3.31129E-01  | 4.28486E-02  | 1.56776E-02  | 59 | AL | 6.81719E-02  | -2.10251E-01 | -3.07084E-02 |
| 20 | AL | 1.77790E-01  | 2.93469E-01  | 9.39614E-02  | 60 | AL | -1.93782E-01 | -1.87925E-01 | -1.02230E-01 |
| 21 | AL | 3.16488E-01  | -4.62665E-01 | 1.29701E-02  | 61 | AL | -2.94512E-01 | 4.21704E-02  | 3.91112E-02  |
| 22 | AL | -3.30378E-01 | -2.00780E-01 | 2.56684E-01  | 62 | AL | -6.72564E-02 | -4.69694E-01 | 2.99695E-01  |
| 23 | AL | -1.86403E-01 | -4.47461E-01 | 1.01871E-02  | 63 | AL | 1.85436E-01  | 4.98487E-01  | -3.84900E-01 |
| 24 | AL | -6.05069E-02 | 2.94923E-01  | 8.70169E-02  | 64 | AL | 4.40800E-02  | -4.83231E-01 | -1.96948E-01 |
| 25 | AL | 7.42295E-02  | 4.83986E-02  | 4.97341E-01  | 65 | O  | -7.33400E-02 | -1.99151E-01 | -3.29095E-01 |
| 26 | AL | 1.94415E-01  | -2.00588E-01 | -4.08436E-01 | 66 | O  | -3.79933E-02 | 3.04515E-01  | -1.52895E-01 |
| 27 | AL | 7.11820E-02  | -4.58824E-01 | -4.96701E-01 | 67 | O  | -1.87652E-01 | -4.7416E-01  | -2.45043E-01 |
| 28 | AL | 4.22688E-01  | 2.92883E-01  | 4.26599E-01  | 68 | O  | -4.48413E-01 | -4.76157E-01 | -6.86157E-02 |
| 29 | AL | 4.42155E-01  | -2.01717E-01 | -4.07125E-01 | 69 | O  | -7.05689E-02 | -1.93312E-01 | -1.52604E-01 |
| 30 | AL | -4.29667E-01 | 3.90569E-02  | -4.91495E-01 | 70 | O  | -7.24384E-02 | 3.03381E-01  | -3.23877E-01 |
| 31 | AL | -1.81093E-01 | 1.68928E-02  | 3.38457E-01  | 71 | O  | -4.31786E-01 | -4.45335E-01 | -2.39111E-01 |
| 32 | AL | -3.06227E-01 | 3.00114E-01  | 4.24732E-01  | 72 | O  | -1.88134E-01 | -4.71250E-01 | -7.01450E-02 |
| 33 | AL | -4.29768E-01 | -4.44144E-01 | -4.91086E-01 | 73 | O  | -3.31973E-01 | 8.2224E-01   | -1.57954E-01 |
| 34 | AL | -5.92227E-02 | 3.04354E-01  | 4.20437E-01  | 74 | O  | -2.93504E-01 | -1.98053E-01 | -3.21269E-01 |
| 35 | AL | -6.69795E-02 | -1.98487E-01 | -4.14237E-01 | 75 | O  | -4.47329E-01 | 4.48809E-02  | -8.04096E-02 |
| 36 | AL | 5.46120E-02  | 3.43023E-02  | -1.58182E-01 | 76 | O  | -1.86863E-01 | 8.43274E-02  | -2.45766E-01 |
| 37 | AL | 8.37903E-02  | -4.58778E-01 | -1.60175E-01 | 77 | O  | -3.05766E-01 | 3.03130E-01  | -3.24113E-01 |
| 38 | AL | 4.40597E-01  | -2.18887E-01 | -7.52693E-02 | 78 | O  | -3.01219E-01 | -1.94047E-01 | -1.56476E-01 |
| 39 | AL | -4.28286E-01 | 1.81993E-02  | -1.61564E-01 | 79 | O  | -1.92082E-01 | 8.78882E-02  | -7.06423E-02 |
| 40 | AL | -1.92808E-01 | 5.35020E-02  | -3.30209E-01 | 80 | O  | -4.23896E-01 | 4.73612E-02  | -2.37494E-01 |

|     |   | x/a          | y/b          | z/c          |     |   | x/a          | y/b          | z/c          |
|-----|---|--------------|--------------|--------------|-----|---|--------------|--------------|--------------|
| 81  | O | 4.42576E-01  | -2.04853E-01 | -3.27518E-01 | 121 | O | 1.77363E-01  | 2.96263E-01  | -4.88526E-01 |
| 82  | O | 4.25692E-01  | 2.53998E-01  | -1.54762E-01 | 122 | O | 1.88190E-01  | -2.32717E-01 | 3.40780E-01  |
| 83  | O | 3.16791E-01  | -4.63917E-01 | -2.42568E-01 | 123 | O | 6.16250E-02  | 2.21823E-02  | -4.15119E-01 |
| 84  | O | 7.02377E-02  | -4.75971E-01 | -7.38105E-02 | 124 | O | 3.20852E-01  | 6.17237E-02  | 4.24494E-01  |
| 85  | O | 4.32394E-01  | -2.04849E-01 | -1.54083E-01 | 125 | O | 1.74221E-01  | 2.73768E-01  | 3.33624E-01  |
| 86  | O | 4.39963E-01  | 2.88273E-01  | -3.23984E-01 | 126 | O | 1.79564E-01  | -2.04307E-01 | -4.94406E-01 |
| 87  | O | 4.77207E-02  | -4.46632E-01 | -2.35667E-01 | 127 | O | 3.14337E-01  | 1.84532E-02  | -4.14352E-01 |
| 88  | O | 3.21180E-01  | -4.81898E-01 | -6.76091E-02 | 128 | O | 4.91329E-02  | 6.19505E-02  | 4.20183E-01  |
| 89  | O | 1.86118E-01  | 2.65529E-01  | -1.48276E-01 | 129 | O | -6.35230E-02 | -2.16785E-01 | 1.00527E-02  |
| 90  | O | 1.80145E-01  | -2.08427E-01 | -3.27867E-01 | 130 | O | -8.11824E-02 | 2.92598E-01  | 1.65858E-01  |
| 91  | O | 6.24472E-02  | 6.15022E-02  | -7.06856E-02 | 131 | O | -1.69577E-01 | -4.45116E-01 | 9.10000E-02  |
| 92  | O | 3.07075E-01  | 3.28547E-02  | -2.42993E-01 | 132 | O | -4.28648E-01 | -4.69434E-01 | 2.63355E-01  |
| 93  | O | 1.75644E-01  | 2.91729E-01  | -3.27570E-01 | 133 | O | -7.21469E-02 | -1.99961E-01 | 1.70552E-01  |
| 94  | O | 1.72996E-01  | -1.88169E-01 | -1.55074E-01 | 134 | O | -7.44700E-02 | 3.17115E-01  | 1.01615E-02  |
| 95  | O | 3.23232E-01  | 4.62259E-02  | -6.74072E-02 | 135 | O | -4.37932E-01 | -4.58524E-01 | 9.17852E-02  |
| 96  | O | 4.18924E-02  | 4.70287E-02  | -2.35927E-01 | 136 | O | -2.00507E-01 | -4.55815E-01 | 2.53498E-01  |
| 97  | O | -6.21070E-02 | -1.93339E-01 | 3.33434E-01  | 137 | O | -3.04598E-01 | 2.98186E-01  | 1.77465E-01  |
| 98  | O | -5.16898E-02 | 2.91697E-01  | -4.97469E-01 | 138 | O | -3.12482E-01 | -2.37835E-01 | 9.62074E-03  |
| 99  | O | -1.85510E-01 | -4.85343E-01 | 4.23734E-01  | 139 | O | -4.34300E-01 | 7.05297E-02  | 2.60904E-01  |
| 100 | O | -4.43402E-01 | -4.45500E-01 | -4.13456E-01 | 140 | O | -1.75814E-01 | 3.99197E-02  | 9.14461E-02  |
| 101 | O | -5.26290E-02 | -2.04245E-01 | -4.94047E-01 | 141 | O | -3.16316E-01 | 3.18041E-01  | 4.72892E-03  |
| 102 | O | -7.07649E-02 | 2.66070E-01  | 3.39605E-01  | 142 | O | -3.04751E-01 | -2.07699E-01 | 1.76819E-01  |
| 103 | O | -4.33665E-01 | -4.84606E-01 | 4.23685E-01  | 143 | O | -2.10516E-01 | 4.02699E-02  | 2.55887E-01  |
| 104 | O | -1.72833E-01 | -4.48900E-01 | -4.08328E-01 | 144 | O | -4.18144E-01 | 4.59443E-02  | 9.13352E-02  |
| 105 | O | -3.15390E-01 | 2.95200E-01  | -4.95046E-01 | 145 | O | 4.32647E-01  | -2.25328E-01 | 6.29437E-03  |
| 106 | O | -3.21903E-01 | -1.89637E-01 | 3.35498E-01  | 146 | O | 4.35306E-01  | 2.96501E-01  | 1.77549E-01  |
| 107 | O | -4.43719E-01 | 4.29492E-02  | -4.13789E-01 | 147 | O | 2.91706E-01  | -4.58201E-01 | 9.25874E-02  |
| 108 | O | -1.89364E-01 | 5.74298E-02  | 4.18026E-01  | 148 | O | 5.60704E-02  | -4.67696E-01 | 2.51277E-01  |
| 109 | O | -3.15114E-01 | 2.75010E-01  | 3.40919E-01  | 149 | O | 4.27583E-01  | -2.02799E-01 | 1.70245E-01  |
| 110 | O | -3.18481E-01 | -2.03143E-01 | -4.99765E-01 | 150 | O | 4.36286E-01  | 3.02764E-01  | 9.26086E-03  |
| 111 | O | -1.72878E-01 | 4.99828E-02  | -4.07430E-01 | 151 | O | 6.44977E-02  | -4.53509E-01 | 9.26930E-02  |
| 112 | O | -4.33705E-01 | 8.26340E-02  | 4.24584E-01  | 152 | O | 3.16291E-01  | -4.68790E-01 | 2.54188E-01  |
| 113 | O | 4.53291E-01  | -2.01840E-01 | 3.37858E-01  | 153 | O | 2.10153E-01  | 2.94347E-01  | 1.74475E-01  |
| 114 | O | 4.51256E-01  | 3.02078E-01  | -4.95019E-01 | 154 | O | 2.02323E-01  | -2.08528E-01 | 1.28055E-02  |
| 115 | O | 3.17405E-01  | -4.57470E-01 | 4.24268E-01  | 155 | O | 7.70147E-02  | 3.94785E-02  | 2.59160E-01  |
| 116 | O | 6.08738E-02  | -4.28903E-01 | -4.14835E-01 | 156 | O | 2.93262E-01  | 4.30366E-02  | 9.31588E-02  |
| 117 | O | 4.55031E-01  | -2.03045E-01 | -4.92215E-01 | 157 | O | 2.09615E-01  | 2.84901E-01  | 1.12206E-02  |
| 118 | O | 4.55676E-01  | 3.03731E-01  | 3.40882E-01  | 158 | O | 1.99566E-01  | -2.04788E-01 | 1.71647E-01  |
| 119 | O | 5.68221E-02  | -4.70603E-01 | 4.25479E-01  | 159 | O | 3.19778E-01  | 6.45472E-02  | 2.54215E-01  |
| 120 | O | 3.13709E-01  | -4.22716E-01 | -4.13839E-01 | 160 | O | 6.21327E-02  | 4.27807E-02  | 9.10739E-02  |

## 5.6 $\eta$ -E-Al<sub>2</sub>O<sub>3</sub>

Primitive cell (1×1×3-supercell) with the space group  $Fd\bar{3}m$  (no. 227) and the lattice constants:

$$a = 5.630 \text{ \AA}, b = 5.630 \text{ \AA}, c = 16.891 \text{ \AA}, \alpha = 60.0^\circ, \beta = 60.0^\circ, \gamma = 60.0^\circ$$

atoms in the asymmetric unit: 40

|    |    | x/a          | y/b          | z/c          |    | x/a | y/b          | z/c          |              |
|----|----|--------------|--------------|--------------|----|-----|--------------|--------------|--------------|
| 1  | AL | 1.02699E-01  | 1.05950E-01  | -1.12185E-01 | 21 | O   | 3.48763E-01  | 4.01264E-01  | 2.92244E-01  |
| 2  | AL | 1.18925E-01  | 1.02860E-01  | 2.11596E-01  | 22 | O   | 3.49016E-01  | 3.90032E-01  | -3.70731E-01 |
| 3  | AL | 1.15859E-01  | 1.21181E-01  | -4.58934E-01 | 23 | O   | -1.28597E-01 | 3.81687E-01  | 1.29196E-01  |
| 4  | AL | 1.23651E-01  | -3.66079E-01 | 3.64934E-01  | 24 | O   | -1.39915E-01 | 3.70885E-01  | 4.69111E-01  |
| 5  | AL | 1.06940E-01  | -3.81308E-01 | -2.85483E-01 | 25 | O   | -1.29059E-01 | 3.83378E-01  | -2.03452E-01 |
| 6  | AL | 1.13026E-01  | -3.75393E-01 | 4.16324E-02  | 26 | O   | 3.49030E-01  | -1.40720E-01 | 1.39353E-01  |
| 7  | AL | 4.84558E-01  | -3.84368E-03 | -3.29668E-01 | 27 | O   | 3.37715E-01  | -1.51218E-01 | 4.83877E-01  |
| 8  | AL | -2.71142E-01 | 2.39356E-01  | 9.28326E-02  | 28 | O   | 3.57686E-01  | -1.29654E-01 | -2.03267E-01 |
| 9  | AL | -2.54768E-01 | 2.55865E-01  | 4.09945E-01  | 29 | O   | -1.08917E-01 | -1.41045E-01 | 2.92224E-01  |
| 10 | AL | -2.76657E-01 | 2.35581E-01  | -2.35475E-01 | 30 | O   | -1.21475E-01 | -1.39608E-01 | -3.70723E-01 |
| 11 | AL | -4.07463E-01 | -3.70855E-01 | 2.11620E-01  | 31 | O   | -1.00901E-01 | -1.36224E-01 | -4.64843E-02 |
| 12 | AL | -3.89811E-01 | -3.73126E-01 | -4.58963E-01 | 32 | O   | -1.28712E-01 | -1.54595E-01 | 1.29219E-01  |
| 13 | AL | -4.06947E-01 | -3.83555E-01 | -1.12377E-01 | 33 | O   | -1.39675E-01 | -1.51561E-01 | 4.68963E-01  |
| 14 | AL | 1.18908E-01  | -3.70929E-01 | 2.11654E-01  | 34 | O   | -1.28972E-01 | -1.55845E-01 | -2.03479E-01 |
| 15 | AL | 1.15667E-01  | -3.73259E-01 | -4.58859E-01 | 35 | O   | -1.33277E-01 | 3.79498E-01  | -4.59690E-02 |
| 16 | AL | 1.03294E-01  | -3.84575E-01 | -1.12240E-01 | 36 | O   | -1.27777E-01 | 3.82382E-01  | 2.82896E-01  |
| 17 | O  | 3.34945E-01  | 3.81762E-01  | 1.29152E-01  | 37 | O   | -1.35318E-01 | 3.76069E-01  | -3.76531E-01 |
| 18 | O  | 3.37611E-01  | 3.71106E-01  | 4.69016E-01  | 38 | O   | 3.51711E-01  | -1.35210E-01 | -4.66125E-02 |
| 19 | O  | 3.31789E-01  | 3.83420E-01  | -2.03464E-01 | 39 | O   | 3.48987E-01  | -1.40814E-01 | 2.92159E-01  |
| 20 | O  | 3.52549E-01  | 4.11288E-01  | -4.67816E-02 | 40 | O   | 3.49295E-01  | -1.39342E-01 | -3.70816E-01 |

## 5.7 $\eta$ -ZS-Al<sub>2</sub>O<sub>3</sub>

Primitive cell (1×1×3-supercell) with the space group  $Fd\bar{3}m$  (no. 227) and the lattice constants:

$$a = 5.748 \text{ \AA}, b = 5.748 \text{ \AA}, c = 17.244 \text{ \AA}, \alpha = 60.0^\circ, \beta = 60.0^\circ, \gamma = 60.0^\circ$$

atoms in the asymmetric unit: 40

|    |    | x/a          | y/b          | z/c          |    | x/a | y/b          | z/c          |              |
|----|----|--------------|--------------|--------------|----|-----|--------------|--------------|--------------|
| 1  | AL | -3.78968E-01 | 4.66520E-01  | 2.52108E-01  | 21 | O   | 3.88626E-01  | 2.63493E-01  | 3.09740E-01  |
| 2  | AL | -3.87480E-01 | -4.25598E-01 | -4.49039E-01 | 22 | O   | 3.68178E-01  | 3.57960E-01  | -3.73851E-01 |
| 3  | AL | -3.99524E-01 | -3.64529E-01 | -1.21484E-01 | 23 | O   | -2.13068E-01 | 4.82007E-01  | 1.30353E-01  |
| 4  | AL | -3.92363E-01 | -3.55916E-01 | -2.95439E-01 | 24 | O   | -1.24345E-01 | 3.26690E-01  | 4.72472E-01  |
| 5  | AL | 1.25293E-01  | 4.69087E-01  | 2.52284E-01  | 25 | O   | -1.61415E-01 | 3.94409E-01  | -2.10305E-01 |
| 6  | AL | 1.33020E-01  | -4.25437E-01 | -4.49055E-01 | 26 | O   | 3.45975E-01  | -1.85117E-02 | 1.00353E-01  |
| 7  | AL | 1.00891E-01  | -3.64851E-01 | -1.21593E-01 | 27 | O   | 3.74067E-01  | -2.09702E-01 | 4.78242E-01  |
| 8  | AL | -3.93468E-01 | 1.42842E-01  | -1.27736E-01 | 28 | O   | 3.73839E-01  | -1.36761E-01 | -2.12695E-01 |
| 9  | AL | 2.21630E-01  | -1.34225E-01 | 5.93350E-02  | 29 | O   | -7.40006E-02 | -2.35505E-01 | 2.86133E-01  |
| 10 | AL | 4.30663E-03  | -3.20422E-02 | -3.34470E-01 | 30 | O   | -1.18449E-01 | -1.78400E-01 | -3.73641E-01 |
| 11 | AL | -2.90778E-01 | -1.36170E-01 | 5.92526E-02  | 31 | O   | -1.34525E-01 | -9.37017E-02 | -6.17825E-02 |
| 12 | AL | 6.30059E-02  | -1.42040E-01 | 3.29918E-01  | 32 | O   | -1.54395E-01 | -3.02213E-02 | 1.03901E-01  |
| 13 | AL | -3.06614E-01 | 3.41357E-01  | 8.06229E-02  | 33 | O   | -1.13748E-01 | -1.89793E-01 | 4.63661E-01  |
| 14 | AL | -2.87504E-01 | 1.79449E-01  | 4.55876E-01  | 34 | O   | -1.41867E-01 | -1.28925E-01 | -2.04954E-01 |
| 15 | AL | 2.30812E-01  | 2.50111E-01  | -2.46391E-01 | 35 | O   | -1.64162E-01 | 4.39448E-01  | -4.64538E-02 |
| 16 | AL | 2.51126E-01  | 1.60953E-01  | 4.36238E-01  | 36 | O   | -1.10574E-01 | 2.51326E-01  | 3.13863E-01  |
| 17 | O  | 3.10464E-01  | 4.83787E-01  | 1.30567E-01  | 37 | O   | -1.36699E-01 | 3.70825E-01  | -3.74853E-01 |
| 18 | O  | 3.52363E-01  | 3.26336E-01  | 4.72570E-01  | 38 | O   | 3.85923E-01  | -9.34166E-02 | -6.16160E-02 |
| 19 | O  | 3.70224E-01  | 3.94518E-01  | -2.10281E-01 | 39 | O   | 4.24975E-01  | -2.38129E-01 | 2.86035E-01  |
| 20 | O  | 3.80396E-01  | 4.16029E-01  | -6.82319E-02 | 40 | O   | 3.91010E-01  | -1.78388E-01 | -3.73674E-01 |

## 5.8 $\delta$ -FE-Al<sub>2</sub>O<sub>3</sub>

Primitive cell with the space group  $P4_12_12$  (no. 92) and the lattice constants:

$a = 7.945 \text{ \AA}$ ,  $b = 7.945 \text{ \AA}$ ,  $c = 23.790 \text{ \AA}$ ,  $\alpha = 90.0^\circ$ ,  $\beta = 90.0^\circ$ ,  $\gamma = 90.0^\circ$

atoms in the asymmetric unit: 21

|    |    | x/a          | y/b          | z/c          |
|----|----|--------------|--------------|--------------|
| 1  | AL | -2.54029E-01 | -1.52454E-02 | 4.08235E-02  |
| 2  | AL | -2.52942E-01 | -2.31714E-03 | 3.73415E-01  |
| 3  | AL | -2.56100E-01 | 4.17531E-03  | -2.93181E-01 |
| 4  | AL | -3.92174E-01 | -3.92174E-01 | 0.00000E+00  |
| 5  | AL | -3.73490E-01 | -3.85694E-01 | 3.36495E-01  |
| 6  | AL | 3.67051E-01  | -1.40258E-01 | -3.71838E-03 |
| 7  | AL | 3.73365E-01  | -1.15938E-01 | 3.31960E-01  |
| 8  | AL | 3.57885E-01  | -1.19572E-01 | -3.37387E-01 |
| 9  | AL | 1.20696E-01  | 1.20696E-01  | 0.00000E+00  |
| 10 | O  | -3.93520E-01 | -1.38698E-01 | -4.27950E-03 |
| 11 | O  | -3.82900E-01 | -1.41298E-01 | 3.28675E-01  |
| 12 | O  | -3.84747E-01 | -1.32389E-01 | -3.37269E-01 |
| 13 | O  | 1.14955E-01  | 3.61071E-01  | -2.90667E-03 |
| 14 | O  | 1.16955E-01  | 3.90356E-01  | 3.29694E-01  |
| 15 | O  | 1.15021E-01  | 3.94222E-01  | -3.35042E-01 |
| 16 | O  | 1.29038E-01  | -1.19640E-01 | 1.73255E-03  |
| 17 | O  | 1.42367E-01  | -1.41751E-01 | 3.36638E-01  |
| 18 | O  | 1.28830E-01  | -1.33198E-01 | -3.29402E-01 |
| 19 | O  | 3.75191E-01  | -3.71130E-01 | 3.59134E-03  |
| 20 | O  | 3.88216E-01  | -3.70604E-01 | 3.30717E-01  |
| 21 | O  | 3.86833E-01  | -3.56057E-01 | -3.28362E-01 |

### 5.9 $\delta$ -RH- $\text{Al}_2\text{O}_3$

Primitive cell with the space group  $P\bar{4}m2$  (no. 115) and the lattice constants:

$a = 5.633 \text{ \AA}$ ,  $b = 5.633 \text{ \AA}$ ,  $c = 23.560 \text{ \AA}$ ,  $\alpha = 90.0^\circ$ ,  $\beta = 90.0^\circ$ ,  $\gamma = 90.0^\circ$

atoms in the asymmetric unit: 41

|    |    | x/a          | y/b          | z/c          |    |   | x/a          | y/b          | z/c          |
|----|----|--------------|--------------|--------------|----|---|--------------|--------------|--------------|
| 1  | AL | -4.21935E-01 | 4.21935E-01  | 0.00000E+00  | 22 | O | -1.80944E-01 | 4.19251E-01  | 4.60146E-01  |
| 2  | AL | 7.80648E-02  | -7.80648E-02 | -5.00000E-01 | 23 | O | 3.55285E-01  | 4.19585E-01  | 4.62416E-01  |
| 3  | AL | -4.38531E-01 | 4.26244E-01  | 3.34002E-01  | 24 | O | -1.69150E-01 | 4.42502E-01  | -3.77177E-01 |
| 4  | AL | -4.24571E-01 | -7.54124E-02 | 2.50000E-01  | 25 | O | 3.20718E-01  | 4.41378E-01  | -3.77713E-01 |
| 5  | AL | -4.20272E-01 | -9.20180E-02 | -4.15996E-01 | 26 | O | -1.95410E-01 | 4.27143E-01  | -2.06802E-01 |
| 6  | AL | -4.07982E-01 | -7.97349E-02 | -8.40014E-02 | 27 | O | 3.46389E-01  | 4.28911E-01  | -2.13017E-01 |
| 7  | AL | 7.37588E-02  | -6.14610E-02 | 1.65998E-01  | 28 | O | -1.51113E-01 | 4.19363E-01  | -4.31962E-02 |
| 8  | AL | -1.81575E-01 | 4.42379E-01  | 2.04300E-01  | 29 | O | 3.07089E-01  | 4.17618E-01  | -3.69832E-02 |
| 9  | AL | 3.25359E-01  | 4.39901E-01  | 2.05292E-01  | 30 | O | -1.79277E-01 | -5.86030E-02 | 1.22287E-01  |
| 10 | AL | -1.64940E-01 | 4.04155E-01  | -4.54299E-01 | 31 | O | 3.30868E-01  | -5.74789E-02 | 1.22826E-01  |
| 11 | AL | 3.28119E-01  | 4.06607E-01  | -4.55295E-01 | 32 | O | -1.53593E-01 | -7.10778E-02 | 2.86982E-01  |
| 12 | AL | -1.73297E-01 | 4.23242E-01  | -1.24997E-01 | 33 | O | 3.04605E-01  | -7.28400E-02 | 2.93194E-01  |
| 13 | AL | -1.71885E-01 | -9.34138E-02 | 4.47067E-02  | 34 | O | -1.92908E-01 | -8.23923E-02 | 4.63016E-01  |
| 14 | AL | 3.35054E-01  | -9.58364E-02 | 4.57068E-02  | 35 | O | 3.48884E-01  | -8.06332E-02 | 4.56802E-01  |
| 15 | AL | 3.26755E-01  | -7.67502E-02 | 3.74998E-01  | 36 | O | -1.67240E-01 | -9.48683E-02 | -3.72284E-01 |
| 16 | AL | -1.74652E-01 | -6.01035E-02 | -2.94703E-01 | 37 | O | 3.22619E-01  | -9.59771E-02 | -3.72823E-01 |
| 17 | AL | 3.18416E-01  | -5.76372E-02 | -2.95702E-01 | 38 | O | -2.01823E-01 | -7.30707E-02 | -2.12415E-01 |
| 18 | O  | -1.77366E-01 | 4.04042E-01  | 1.27176E-01  | 39 | O | 3.34416E-01  | -7.27387E-02 | -2.10145E-01 |
| 19 | O  | 3.32776E-01  | 4.05158E-01  | 1.27711E-01  | 40 | O | -1.44706E-01 | -8.04129E-02 | -3.75845E-02 |
| 20 | O  | -1.65573E-01 | 4.27272E-01  | 2.89855E-01  | 41 | O | 3.19053E-01  | -8.07446E-02 | -3.98565E-02 |
| 21 | O  | 2.98193E-01  | 4.26943E-01  | 2.87582E-01  |    |   |              |              |              |

### 5.10 $\iota$ - $\text{Al}_2\text{O}_3$

Primitive cell ( $1 \times 1 \times 3$ -supercell) with the space group  $Pbam$  (no. 55) and the lattice constants:



a = 7.613 Å, b = 7.218 Å, c = 9.135 Å,  $\alpha = 90.0^\circ$ ,  $\beta = 90.0^\circ$ ,  $\gamma = 90.0^\circ$

atoms in the asymmetric unit: 30

|    |    | x/a          | y/b          | z/c          |    |   | x/a          | y/b          | z/c          |
|----|----|--------------|--------------|--------------|----|---|--------------|--------------|--------------|
| 1  | AL | 3.76643E-01  | 4.80128E-01  | 0.00000E+00  | 16 | O | -2.81746E-02 | 1.08684E-01  | 5.00000E-01  |
| 2  | AL | 3.78932E-01  | 4.85577E-01  | 3.34635E-01  | 17 | O | 2.00109E-01  | -4.84143E-01 | -1.59385E-01 |
| 3  | AL | -1.29122E-01 | -7.67545E-03 | 0.00000E+00  | 18 | O | 2.36760E-01  | -4.51687E-01 | 5.00000E-01  |
| 4  | AL | -1.22931E-01 | -1.42803E-02 | 3.33098E-01  | 19 | O | -4.82024E-01 | 4.24629E-01  | -1.71446E-01 |
| 5  | AL | -4.15920E-01 | -2.84952E-01 | 5.00000E-01  | 20 | O | -4.46120E-01 | 4.54566E-01  | 5.00000E-01  |
| 6  | AL | 1.36837E-02  | -3.20419E-01 | -1.64664E-01 | 21 | O | -1.69602E-01 | -4.80746E-01 | -1.70075E-01 |
| 7  | AL | 2.53500E-02  | -3.16296E-01 | 5.00000E-01  | 22 | O | -7.41177E-02 | 4.54237E-01  | 5.00000E-01  |
| 8  | AL | -2.71253E-01 | 2.91776E-01  | -1.69200E-01 | 23 | O | -4.93694E-01 | -3.01926E-01 | 0.00000E+00  |
| 9  | AL | -2.58495E-01 | 2.95057E-01  | 5.00000E-01  | 24 | O | 4.89691E-01  | -2.81960E-01 | 3.23926E-01  |
| 10 | AL | -3.71148E-01 | -3.25518E-01 | -1.66652E-01 | 25 | O | 2.81609E-01  | 2.32769E-01  | 0.00000E+00  |
| 11 | AL | 1.70027E-01  | 2.56534E-01  | -1.67686E-01 | 26 | O | 2.62454E-01  | 2.57715E-01  | 3.43237E-01  |
| 12 | AL | 1.24531E-01  | 2.97204E-01  | 5.00000E-01  | 27 | O | 4.78601E-02  | -1.91615E-01 | 0.00000E+00  |
| 13 | O  | -2.17988E-01 | -1.36339E-01 | -1.66777E-01 | 28 | O | 5.21940E-02  | -1.97458E-01 | 3.29970E-01  |
| 14 | O  | -2.12657E-01 | -1.72169E-01 | 5.00000E-01  | 29 | O | -2.98767E-01 | 1.76488E-01  | 0.00000E+00  |
| 15 | O  | -3.27267E-02 | 1.44188E-01  | -1.66600E-01 | 30 | O | -2.96520E-01 | 1.68716E-01  | 3.36807E-01  |

### 5.11 $Rh_2O_3-Al_2O_3$

Primitive cell (at 113 GPa) with the space group  $Pbcn$  (no. 60) and the lattice constants:

a = 6.418 Å, b = 4.412 Å, c = 4.576 Å,  $\alpha = 90.0^\circ$ ,  $\beta = 90.0^\circ$ ,  $\gamma = 90.0^\circ$

atoms in the asymmetric unit: 3

|   |    | x/a          | y/b          | z/c         |
|---|----|--------------|--------------|-------------|
| 1 | AL | 1.12507E-01  | -2.47216E-01 | 3.93485E-02 |
| 2 | O  | -1.54859E-01 | -3.92840E-01 | 1.02613E-01 |
| 3 | O  | -4.91782E-20 | 5.74690E-02  | 2.50000E-01 |

### 5.12 $CaIrO_3-Al_2O_3$

Conventional cell with the space group  $Cmcm$  (no. 63) and the lattice constants:

a = 2.441 Å, b = 8.017 Å, c = 6.078 Å,  $\alpha = 90.0^\circ$ ,  $\beta = 90.0^\circ$ ,  $\gamma = 90.0^\circ$

atoms in the asymmetric unit: 4

|   |    | x/a         | y/b          | z/c         |
|---|----|-------------|--------------|-------------|
| 1 | AL | 0.00000E+00 | -2.50884E-01 | 2.49999E-01 |
| 2 | AL | 0.00000E+00 | 0.00000E+00  | 0.00000E+00 |
| 3 | O  | 0.00000E+00 | 9.18068E-02  | 2.49999E-01 |
| 4 | O  | 5.00000E-01 | -1.44137E-01 | 4.29453E-01 |

### 5.13 Boehmite

Conventional cell with the space group  $Cmcm$  (no. 63) and the lattice constants:

$a = 2.872 \text{ \AA}$ ,  $b = 12.125 \text{ \AA}$ ,  $c = 3.742 \text{ \AA}$ ,  $\alpha = 90.0^\circ$ ,  $\beta = 90.0^\circ$ ,  $\gamma = 90.0^\circ$

atoms in the asymmetric unit: 4

|   |    | x/a         | y/b          | z/c         |
|---|----|-------------|--------------|-------------|
| 1 | Al | 5.00000E-01 | 1.81775E-01  | 2.30401E-01 |
| 2 | O  | 5.00000E-01 | -2.09364E-01 | 2.31622E-01 |
| 3 | O  | 5.10696E-18 | 7.91124E-02  | 2.31858E-01 |
| 4 | H  | 1.27674E-18 | 3.09680E-02  | 4.48117E-01 |

### 5.14 Gibbsite

Primitive cell with the space group  $P2_1/c$  (no. 14) and the lattice constants:

$a = 9.681 \text{ \AA}$ ,  $b = 5.064 \text{ \AA}$ ,  $c = 12.877 \text{ \AA}$ ,  $\alpha = 90.0^\circ$ ,  $\beta = 137.8^\circ$ ,  $\gamma = 90.0^\circ$

atoms in the asymmetric unit: 14

|    |    | x/a          | y/b          | z/c          |
|----|----|--------------|--------------|--------------|
| 1  | Al | -1.69955E-01 | -4.64650E-01 | -1.68168E-01 |
| 2  | Al | -3.36255E-01 | 2.96652E-02  | -3.35039E-01 |
| 3  | O  | -2.96479E-01 | 2.21536E-01  | -1.84670E-01 |
| 4  | O  | 2.21184E-01  | -3.51868E-01 | 3.25701E-01  |
| 5  | O  | 3.87189E-01  | 1.37295E-01  | 4.92651E-01  |
| 6  | O  | -9.31922E-02 | -3.66272E-01 | 1.43580E-02  |
| 7  | O  | -4.13560E-01 | -2.79419E-01 | -3.07375E-01 |
| 8  | O  | 6.50713E-02  | 1.39217E-01  | 1.68732E-01  |
| 9  | H  | -2.01507E-01 | 1.37082E-01  | -8.33770E-02 |
| 10 | H  | 3.19291E-01  | -4.48969E-01 | 4.24248E-01  |
| 11 | H  | 2.91649E-01  | 1.08495E-01  | 4.97874E-01  |
| 12 | H  | -6.59950E-02 | -1.81141E-01 | 4.71472E-02  |
| 13 | H  | 4.97810E-01  | -2.66510E-01 | -2.94685E-01 |
| 14 | H  | -1.98756E-02 | 1.60401E-01  | 1.85011E-01  |

### 5.15 Bayerite

Primitive cell with the space group  $P2_1/c$  (no. 14) and the lattice constants:

$a = 9.348 \text{ \AA}$ ,  $b = 8.699 \text{ \AA}$ ,  $c = 10.610 \text{ \AA}$ ,  $\alpha = 90.0^\circ$ ,  $\beta = 151.489731^\circ$ ,  $\gamma = 90.0^\circ$

atoms in the asymmetric unit: 14

|    |    | x/a          | y/b          | z/c          |
|----|----|--------------|--------------|--------------|
| 1  | AL | 4.68519E-01  | 1.65697E-01  | 4.72145E-01  |
| 2  | AL | -3.86664E-02 | 3.33209E-01  | -3.40916E-02 |
| 3  | O  | 2.58994E-01  | -4.89766E-01 | -1.27913E-01 |
| 4  | O  | -2.50035E-01 | 3.27419E-01  | -3.56779E-01 |
| 5  | O  | -3.40496E-01 | 3.05297E-01  | 2.76828E-01  |
| 6  | O  | 2.39135E-01  | 4.87014E-01  | 1.27389E-01  |
| 7  | O  | -2.52119E-01 | -3.22691E-01 | 3.51901E-01  |
| 8  | O  | -1.55001E-01 | -3.05489E-01 | -2.74229E-01 |
| 9  | H  | 2.54884E-01  | -4.92506E-01 | -3.79614E-02 |
| 10 | H  | -1.16170E-01 | 2.98558E-01  | -3.23735E-01 |
| 11 | H  | -4.79661E-01 | 2.68912E-01  | 2.34750E-01  |
| 12 | H  | 4.39567E-01  | 4.61367E-01  | 3.14613E-01  |
| 13 | H  | -1.58935E-01 | -4.20299E-01 | 4.48909E-01  |
| 14 | H  | -1.92591E-01 | -3.97961E-01 | -3.52437E-01 |

## 5.16 Tohdite

Primitive cell with the space group  $P6_3mc$  (no. 186) and the lattice constants:

$a = 5.612 \text{ \AA}$ ,  $b = 5.612 \text{ \AA}$ ,  $c = 8.777 \text{ \AA}$ ,  $\alpha = 90.0^\circ$ ,  $\beta = 90.0^\circ$ ,  $\gamma = 120.0^\circ$

**atoms in the asymmetric unit: 8**

|   |    | x/a          | y/b          | z/c          |
|---|----|--------------|--------------|--------------|
| 1 | AL | 1.65800E-01  | 3.31601E-01  | 3.74973E-01  |
| 2 | AL | -3.33333E-01 | 3.33333E-01  | 1.67726E-01  |
| 3 | AL | 3.33333E-01  | -3.33333E-01 | 5.50480E-02  |
| 4 | O  | 0.00000E+00  | 0.00000E+00  | -5.16662E-03 |
| 5 | O  | -4.84874E-01 | 3.02508E-02  | 9.63217E-03  |
| 6 | O  | -1.65593E-01 | -3.31187E-01 | 2.71697E-01  |
| 7 | O  | 3.33333E-01  | -3.33333E-01 | 2.63499E-01  |
| 8 | H  | 0.00000E+00  | 0.00000E+00  | 1.08283E-01  |
