# Supplementary figures and images for: Quantum-chemical study of stable, meta-stable and high-pressure alumina polymorphs and aluminum hydroxides
Source: Royal Society of Chemistry journal article supplement (doi:10.1039/c4ta02663b), 2014-01-01

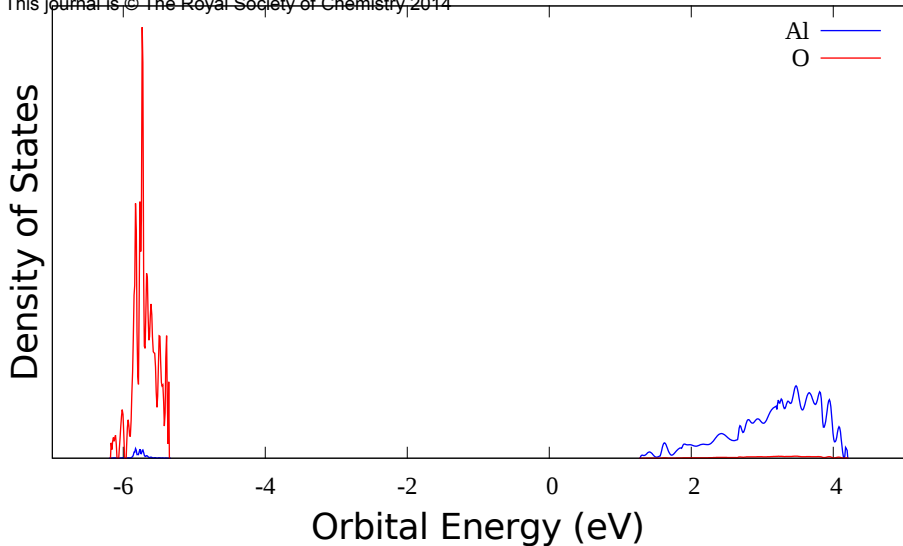

Supplement: c4ta02663b16.pdf [file c4ta02663b16.pdf]

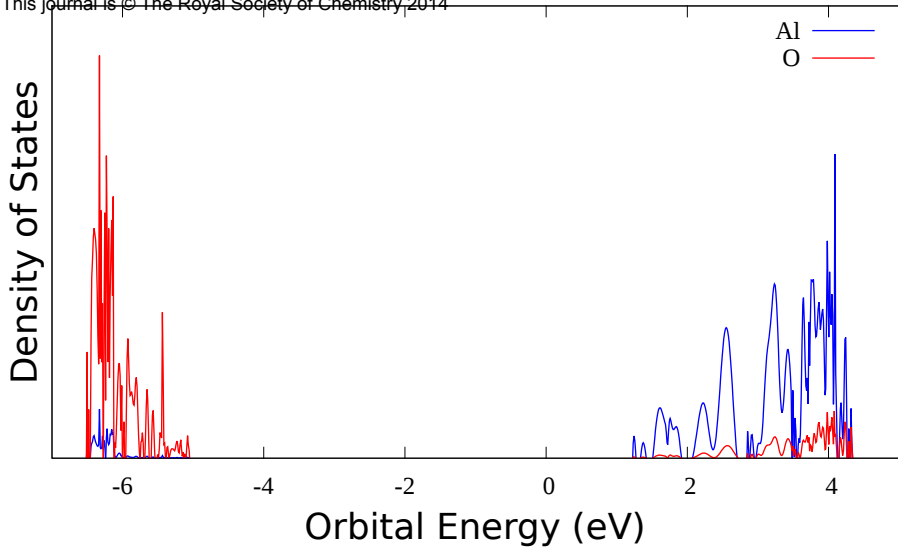

Supplement: c4ta02663b18.pdf [file c4ta02663b18.pdf]

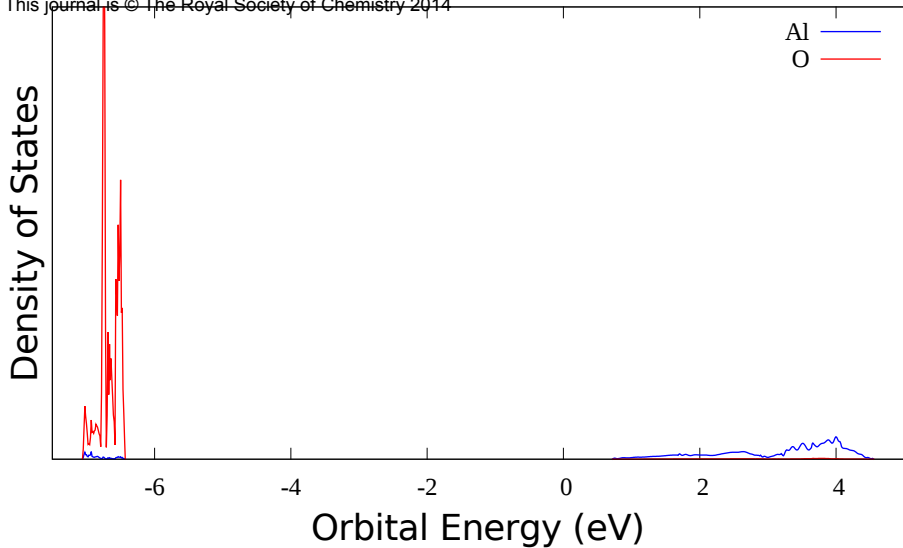

Supplement: c4ta02663b19.pdf [file c4ta02663b19.pdf]

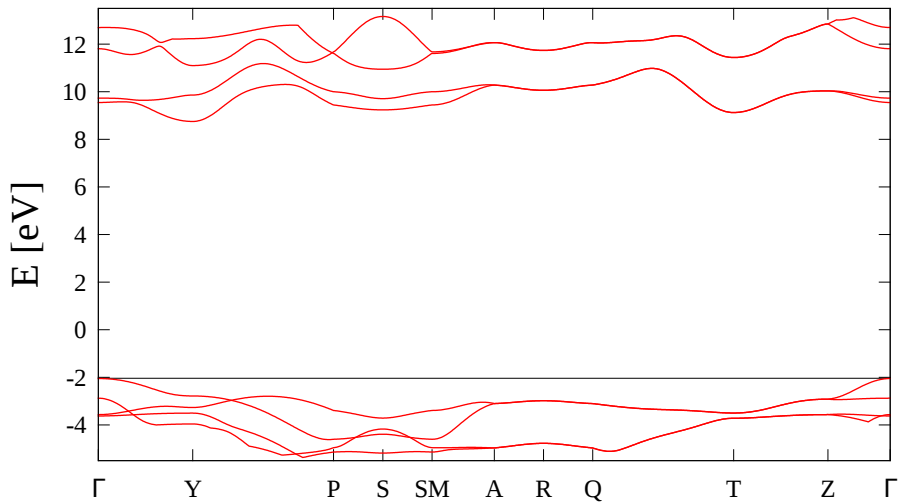

Supplement: c4ta02663b2.pdf [file c4ta02663b2.pdf]

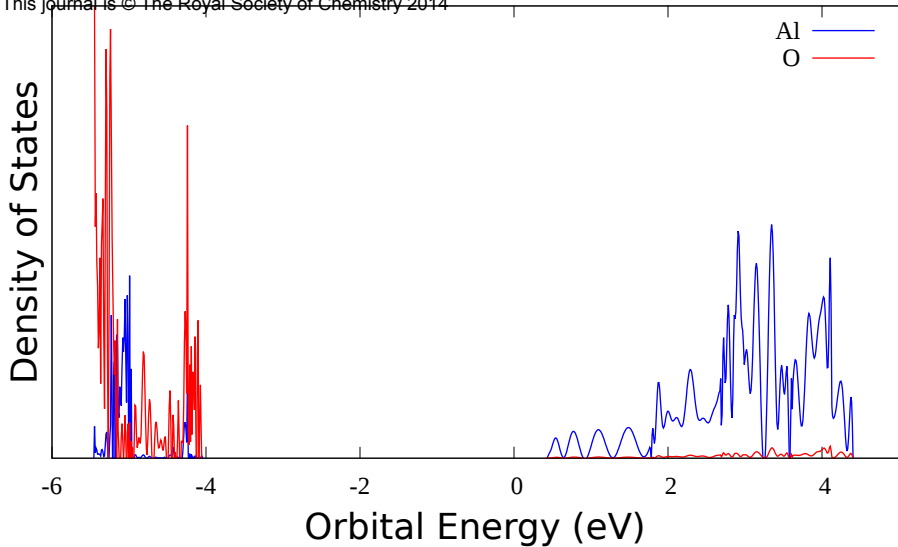

Supplement: c4ta02663b23.pdf [file c4ta02663b23.pdf]

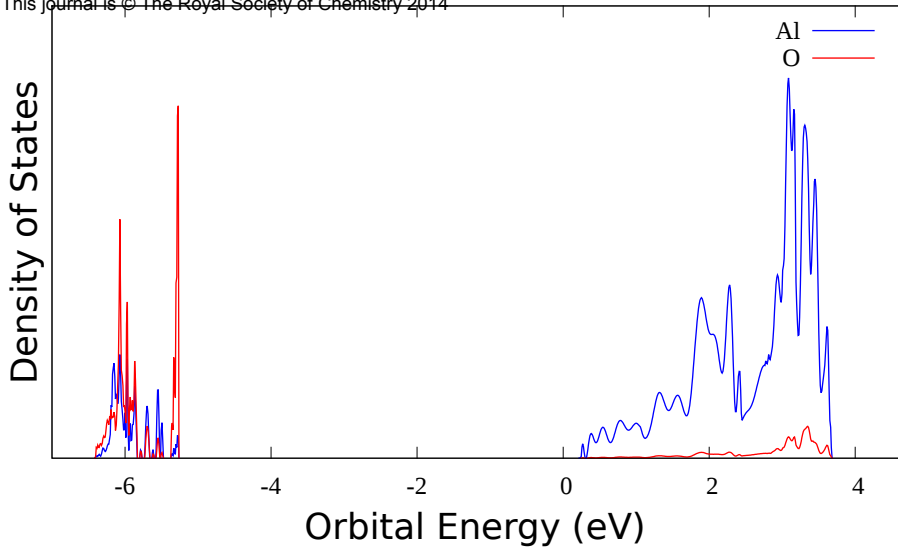

Supplement: c4ta02663b24.pdf [file c4ta02663b24.pdf]

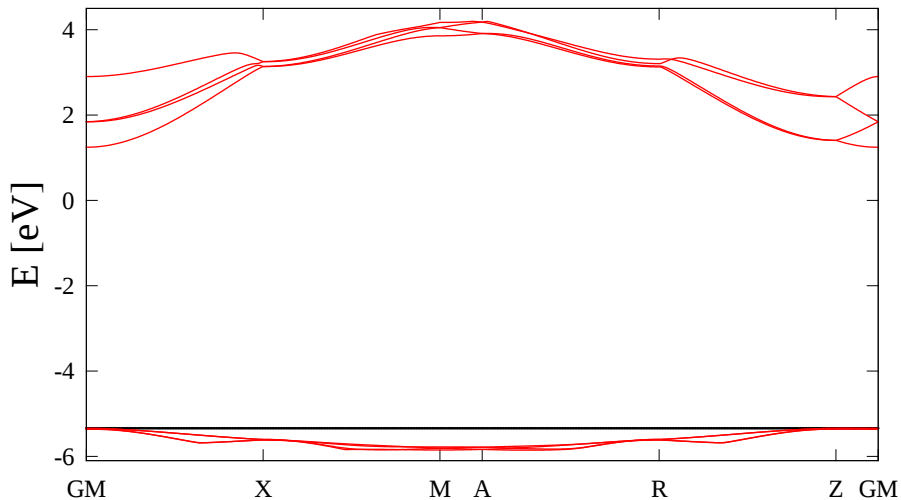

Supplement: c4ta02663b4.pdf [file c4ta02663b4.pdf]

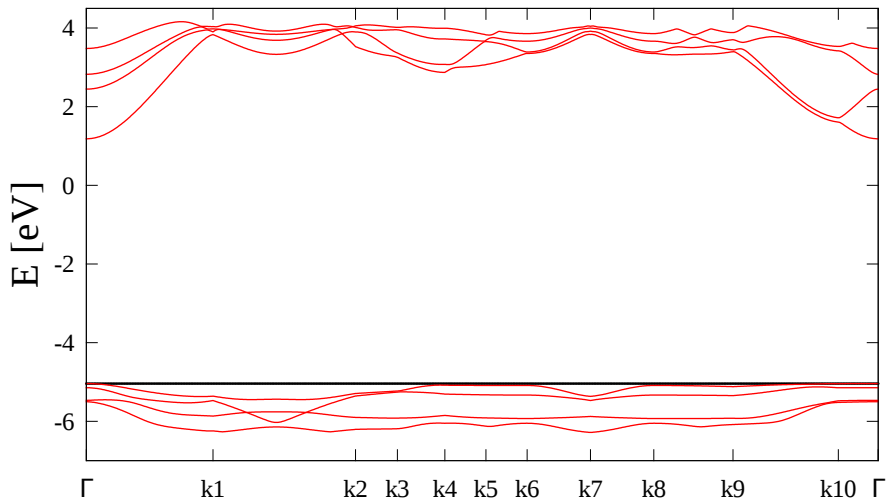

Supplement: c4ta02663b8.pdf [file c4ta02663b8.pdf]
